# Supplementary material for: A multi-ancestry GWAS of Fuchs corneal dystrophy highlights the contributions of laminins, collagen, and endothelial cell regulation
Source: PubMed Central journal article supplement (PMC10998918; doi:10.1038/s42003-024-06046-3), 2024-04-06
Supplement: 42003_2024_6046_MOESM3_ESM.pdf [file 42003_2024_6046_MOESM3_ESM.pdf]

## Description of Additional Supplementary Files

**File name:** Supplementary Data 1

**Description:** Study overview.

**File name:** Supplementary Data 2

**Description:** Significant MVP discovery loci.

**File name:** Supplementary Data 3

**Description:** Genome-wide significant loci in the multi-ancestry meta-analysis of Fuchs Endothelial Corneal Dystrophy (FECD), by individual cohort.

**File name:** Supplementary Data 4

**Description:** Ocular trait pleiotropy.

**File name:** Supplementary Data 5

**Description:** Comparison of corneal effect sizes.

**File name:** Supplementary Data 6

**Description:** The source data behind Fig. 3 in the paper.

**File name:** Supplementary Data 7

**Description:** Association of FECD status with polygenic scores (PGS).

**File name:** Supplementary Data 8

**Description:** Index variant phenome-wide association scans (PheWAS).

**File name:** Supplementary Data 9

**Description:** Colocalization results.
